# Supplementary material
Source: PubMed Central journal article supplement (PMC10500883)

### Supplementary Figure 1

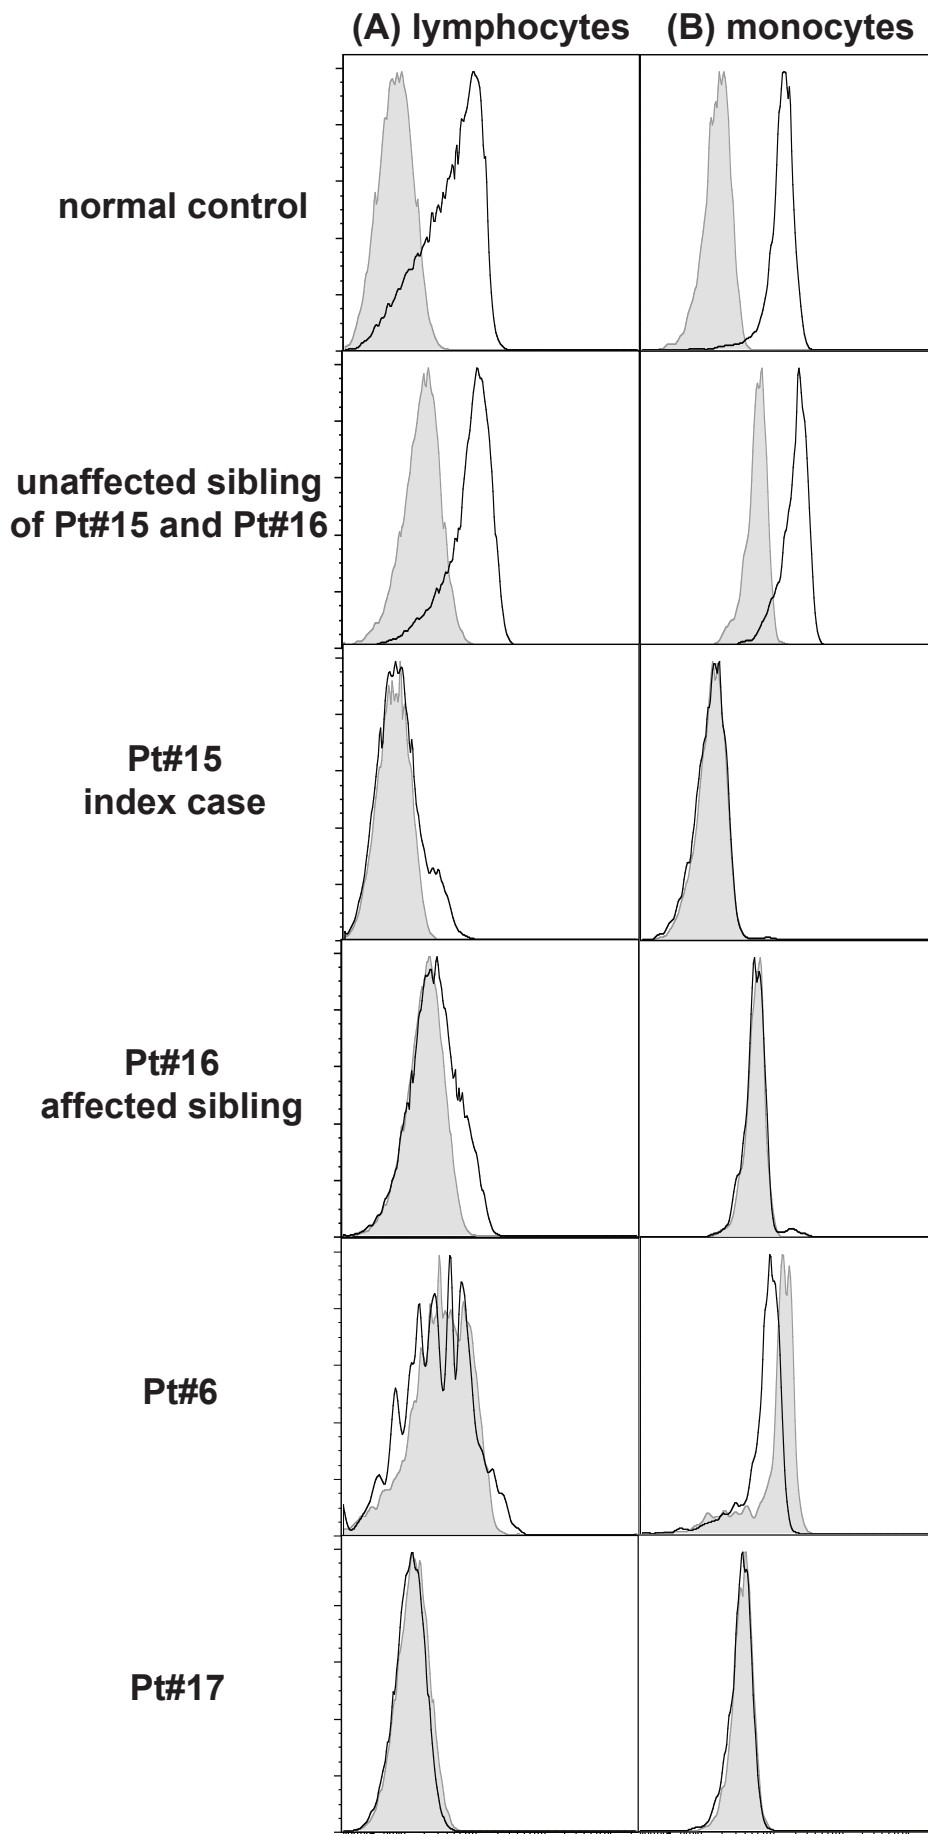

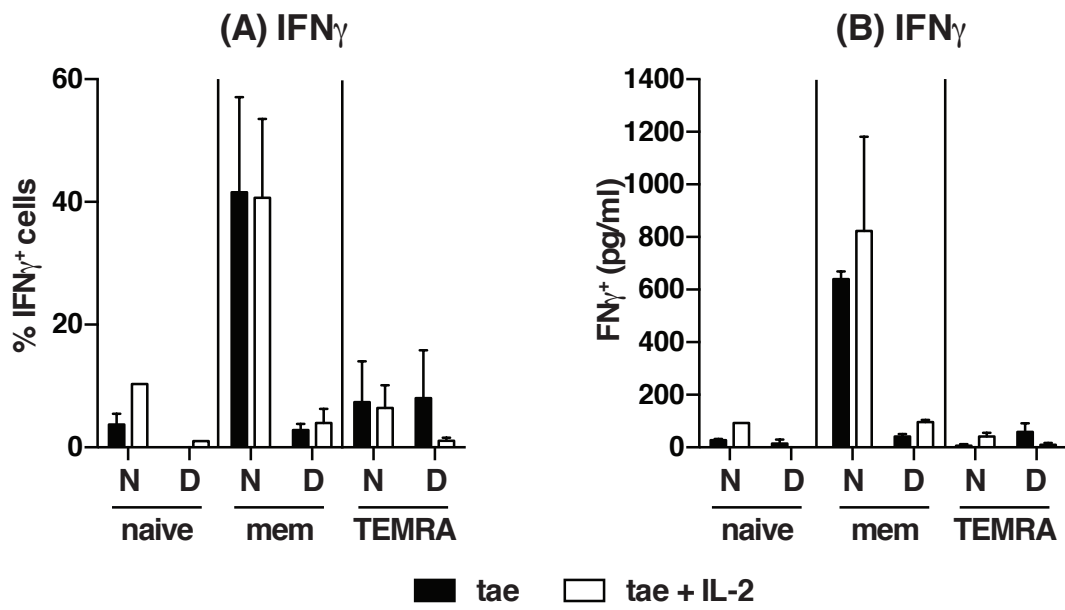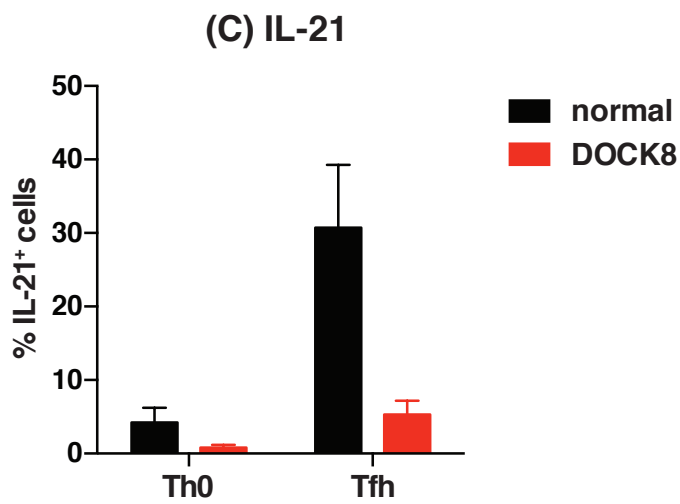

Supplement: NIHMS1618597-supplement-1.pdf [file NIHMS1618597-supplement-1.pdf]
